# Supplementary material for: Echinacoside inhibits breast cancer metastasis by targeting PAD4 to reduce NETs formation
Source: Research Square preprint supplement (doi:10.21203/rs.3.rs-7310878/v1), 2025-11-21
Supplement: Supplementary file 1 [file c63a5708707dfcb91bcbcc75.docx]

**Supplementary Materials**

**S1**


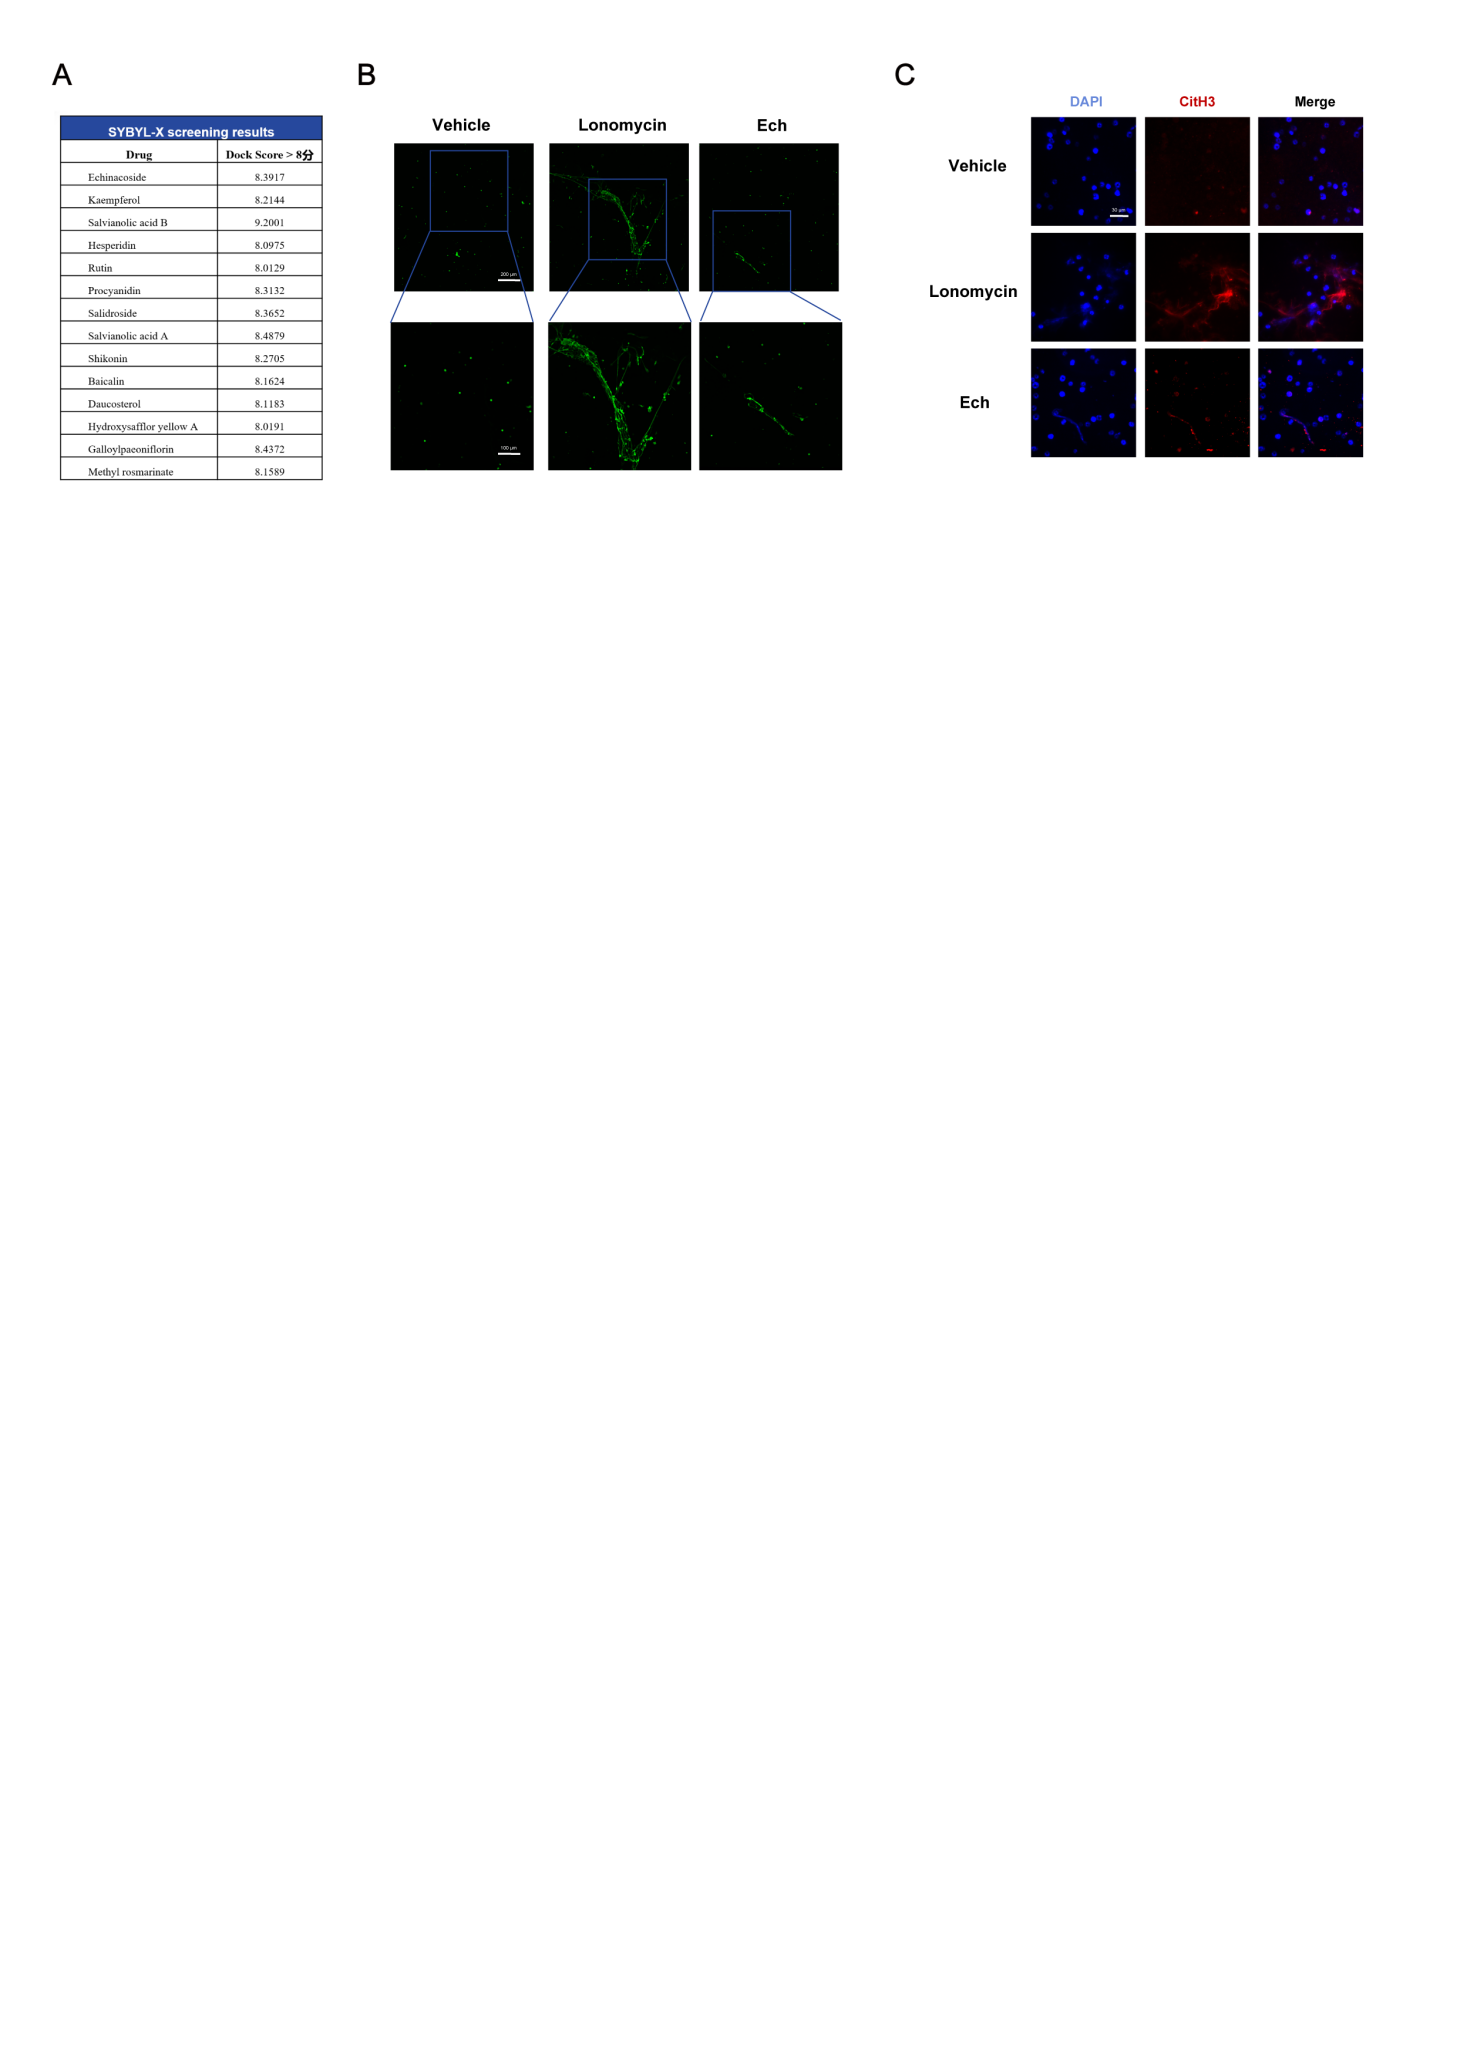


**Fig. S1. Echinacoside Inhibits NET Formation via Direct Binding to PAD4.** (A) Screening results from SYBYL-X software, with a cutoff score of 8. (B) Representative images of neutrophil immunofluorescence showing NET expression, with the upper image at 200 μm and the lower image at 100 μm. (C) Representative images of neutrophil immunofluorescence showing CitH3 protein expression at 30 μm.

**S2**


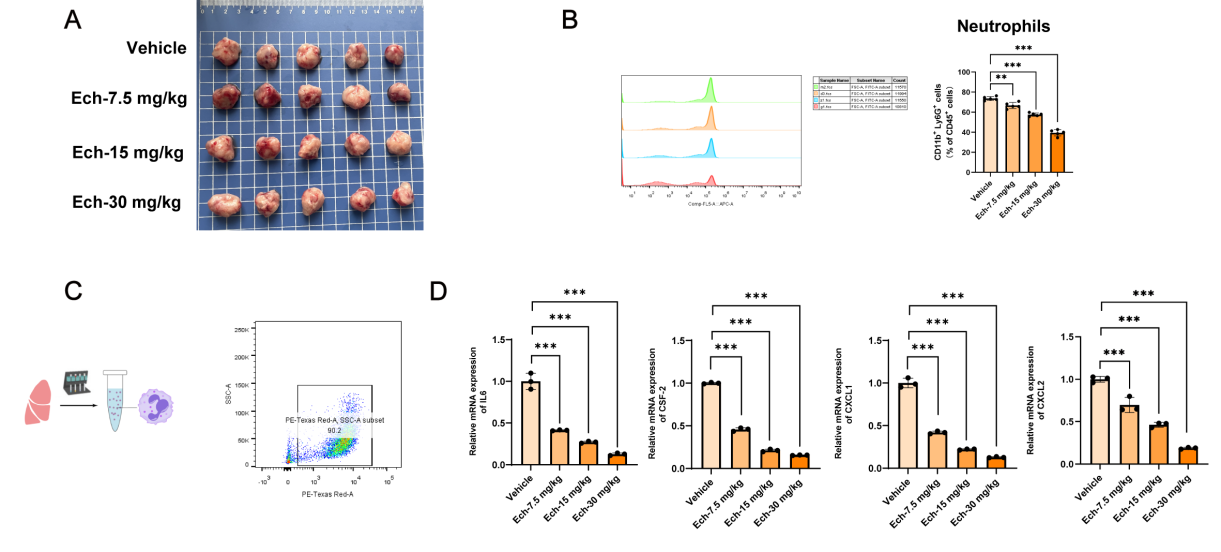


**Fig. S2. Echinacoside inhibits lung metastasis in an in situ breast cancer model.** (A) Representative images of tumors. (B) Flow cytometric analysis of CD11b+Ly6G+ cells in mouse lung tissue, *n* =5. (C) Assessment of the purity of neutrophil sorting in the lung tissue of mammary fat pad in situ injection model mice. (D) mRNA expression levels of IL6, CSF-2, CXCL1, and CXCL2 in the lung tissue, *n* =3. All the data are presented as the means ± SDs. Statistical analysis was performed via ordinary one-way ANOVA. ** *p* <0.01, *** *p* <0.001 versus the vehicle group.

**S3**


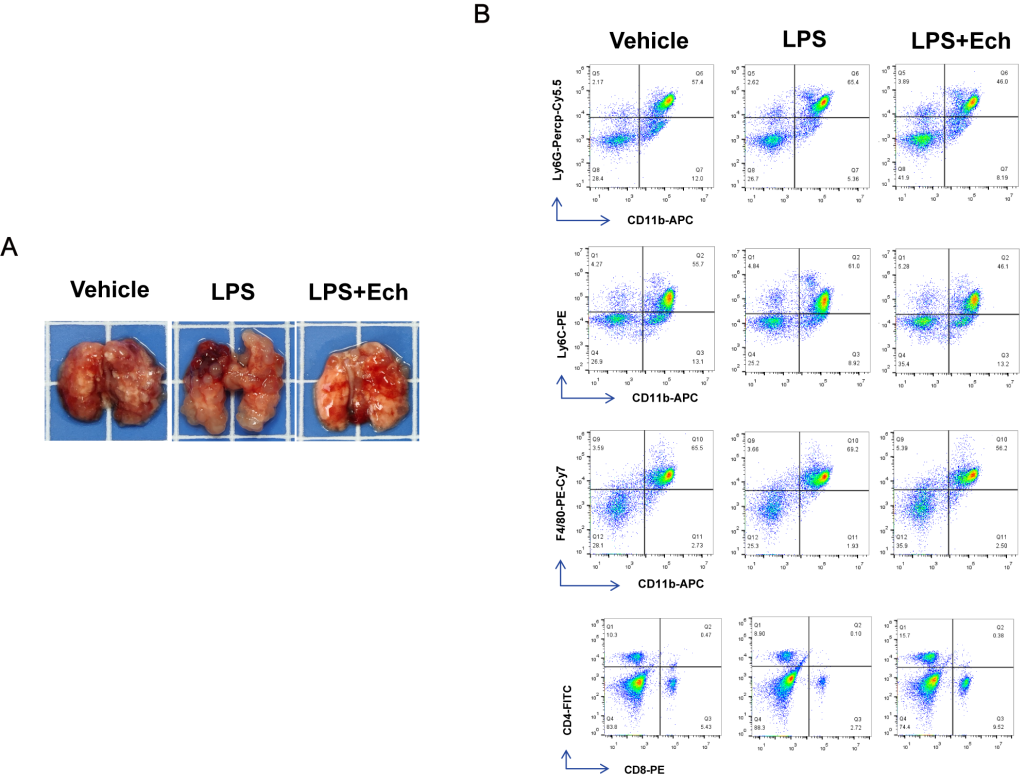


**Fig. S3. Echinacoside Attenuates the NET-Induced Metastatic Microenvironment.** (A) Representative images of lungs from the experimental lung metastasis mouse model, *n* =5. (B) Flow cytometric analysis of CD11b+Ly6G+ (neutrophils), CD11b+Ly6C+ (monocytes), CD11b+F4/80+ (macrophages), CD3+CD8+, and CD3+CD4+ (T cells) in mouse lung tissue, *n* =5.

**S4**


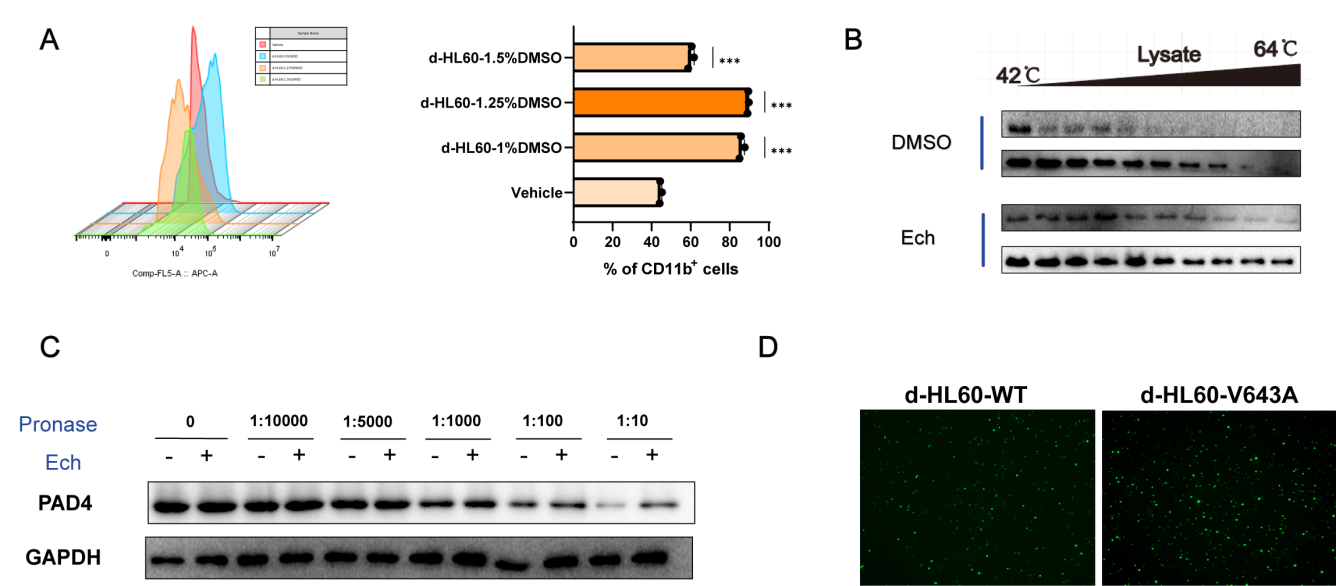


**Fig. S4. Interaction of Echinacoside with PAD4 at the Key Residue VAL643.** (A) Flow cytometric purity analysis and statistical results of the conversion of HL60 cells to d-HL60 by different concentrations of DMSO.
(B-C) Cell thermal shift assay (CETSA) (b) and drug affinity responsive target stability (DARTS) assay (c) to assess the binding of Echinacoside with PAD4 in d-HL60 cells. (D) Construction of a cell model with the PAD4 key binding site VAL643 mutation in d-HL60 cells via plasmid transfection.All the data are presented as the means ± SDs. Statistical analysis was performed via ordinary one-way ANOVA. *** *p* <0.001 versus the vehicle group.
